# Supplementary material
Source: HighWire-hosted journal article supplement (https://www.highwirestage.com/highwire/filestream/56059/field_highwire_adjunct_files/0/17-00289.pdf)
Supplement: 17-00289.pdf [file 17-00289.pdf]

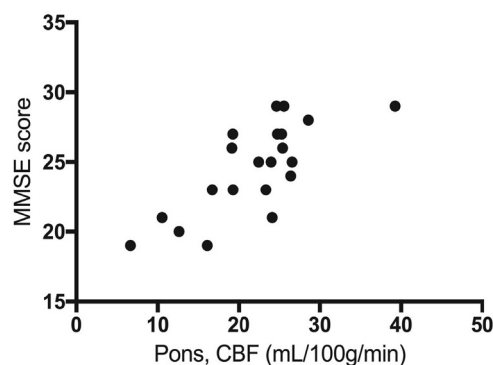

**ON-LINE FIGURE.** Scatterplot illustrating the correlation between the MMSE score and cerebral blood flow in the pons in patients with iNPH. Spearman correlation,  $r = 0.71$ ,  $P < .001$ .

**On-line Table 1: Correlations between CBF and clinical symptoms<sup>a</sup>**

|                    | MMSE Score        | Incontinence Scale | Romberg Test | Gait Speed |
|--------------------|-------------------|--------------------|--------------|------------|
| Cerebellum         | 0.63 <sup>b</sup> | −0.013             | −0.15        | −0.082     |
| MFC                | 0.45 <sup>c</sup> | −0.16              | 0.20         | −0.30      |
| Lentiform nucleus  | 0.23              | 0.31               | 0.13         | 0.10       |
| MTL                | 0.027             | 0.29               | −0.25        | 0.28       |
| HCC                | 0.40              | 0.27               | −0.17        | 0.34       |
| Pons               | 0.71 <sup>d</sup> | 0.076              | −0.093       | 0.11       |
| SMA                | 0.27              | 0.27               | −0.091       | 0.23       |
| Thalamus           | 0.54 <sup>c</sup> | −0.095             | 0.11         | −0.11      |
| Frontal WM         | 0.54 <sup>c</sup> | −0.24              | 0.15         | −0.096     |
| Lateral WM         | 0.45 <sup>c</sup> | −0.069             | 0.17         | −0.036     |
| Superior WM        | 0.44 <sup>c</sup> | 0.17               | 0.088        | 0.027      |
| Periventricular WM | 0.60 <sup>b</sup> | −0.11              | 0.16         | 0.0013     |

**Note:**—HCC indicates high-convexity cortex; MFC, medial frontal cortex; MTL, medial temporal lobe; SMA, supplementary motor area.

<sup>a</sup> Numbers in cells are Spearman correlation coefficients.  $r = 40$ – $50$ , interpreted as a moderate correlation.  $r > 0.60$ , interpreted as a strong correlation.

<sup>b</sup>  $P < .01$ .

<sup>c</sup>  $P < .05$ .

<sup>d</sup>  $P < .001$ .

**On-line Table 2: Correlations between morphologic imaging findings and clinical symptoms<sup>a</sup>**

|                    | DWMH               | DESH              | CA                 | Evans Index Score  |
|--------------------|--------------------|-------------------|--------------------|--------------------|
| Cerebellum         | −0.037             | 0.18              | −0.30              | −0.068             |
| MFC                | −0.25              | 0.067             | 0.0019             | −0.27              |
| Lentiform nucleus  | 0.14               | 0                 | 0.31               | −0.46 <sup>b</sup> |
| MTL                | −0.053             | 0.37              | −0.13              | 0.074              |
| HCC                | −0.19              | 0.42              | −0.23              | 0.039              |
| Pons               | −0.20              | 0.033             | −0.21              | 0.0065             |
| SMA                | −0.25              | 0.45 <sup>b</sup> | 0.0052             | −0.12              |
| Thalamus           | −0.11              | −0.017            | −0.31              | −0.078             |
| Frontal WM         | −0.60 <sup>c</sup> | −0.013            | −0.29              | 0.047              |
| Lateral WM         | −0.16              | 0.050             | −0.50 <sup>b</sup> | 0.078              |
| Superior WM        | −0.23              | 0.30              | −0.33              | 0.17               |
| Periventricular WM | −0.44 <sup>b</sup> | −0.05             | −0.23              | −0.23              |

**Note:**—DESH indicates disproportionately enlarged subarachnoid space hydrocephalus; CA, callosal angle; HCC, high-convexity cortex; MFC, medial frontal cortex; MTL, medial temporal lobe; SMA, supplementary motor area.

<sup>a</sup> Numbers in cells are Spearman correlation coefficients.  $r = 40$ – $50$ , interpreted as a moderate correlation.  $r > 0.60$ , interpreted as a strong correlation.

<sup>b</sup>  $P < .05$ .

<sup>c</sup>  $P < .01$ .

Examples of regions of interests (ROIs) drawn on coregistered FLAIR images. Patients with iNPH to the left with respective matched control to the right.

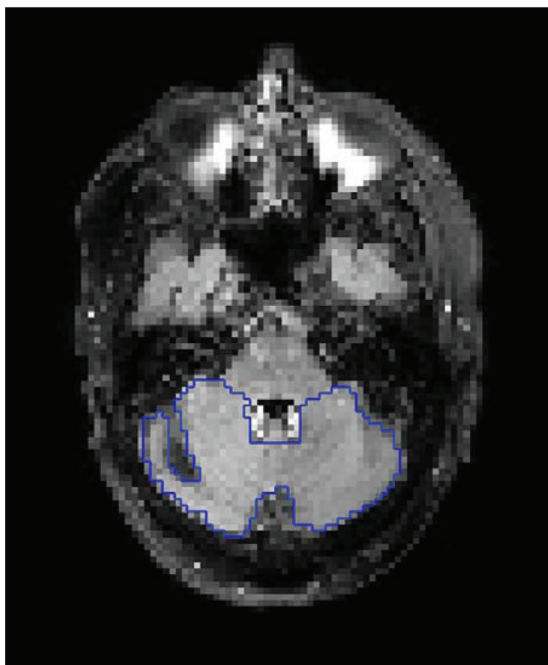

**Cerebellum** in a patient with iNPH. Measured on two slices, with the inferior slice at the level of the middle cerebellar peduncle.

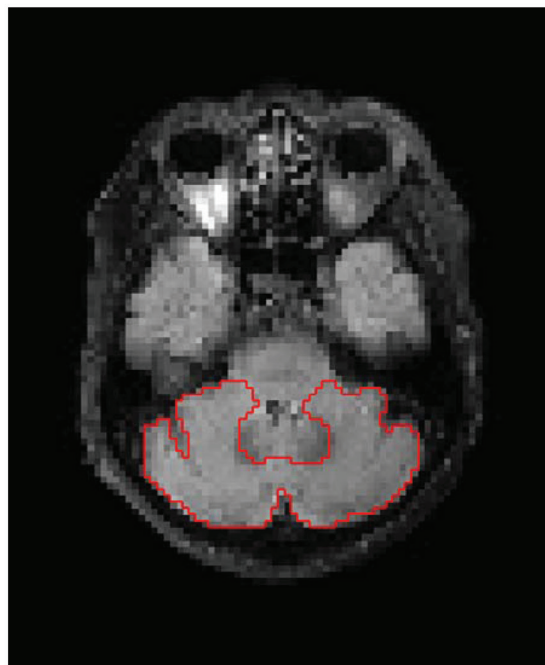

**Cerebellum** in a matched control.

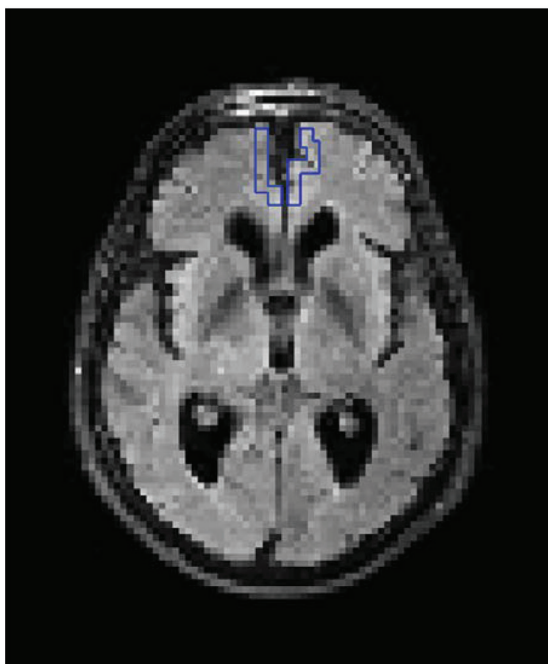

**Medial frontal cortex** in a patient with iNPH. Measured on three slices and the ROIs were 2-3 voxels wide.

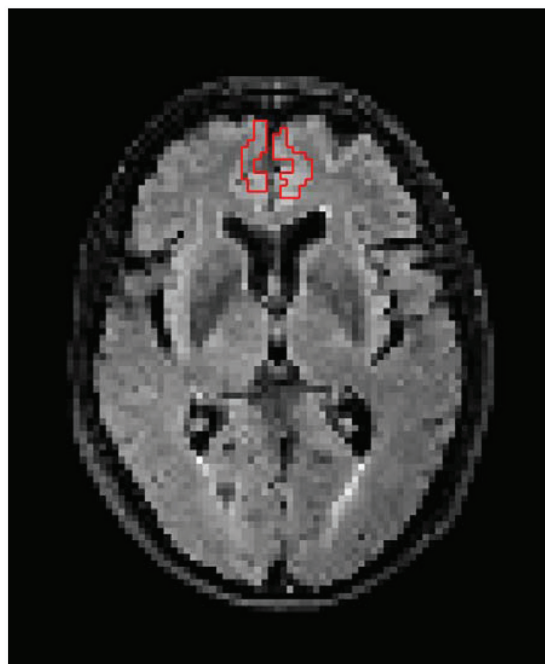

**Medial frontal cortex** in a matched control.

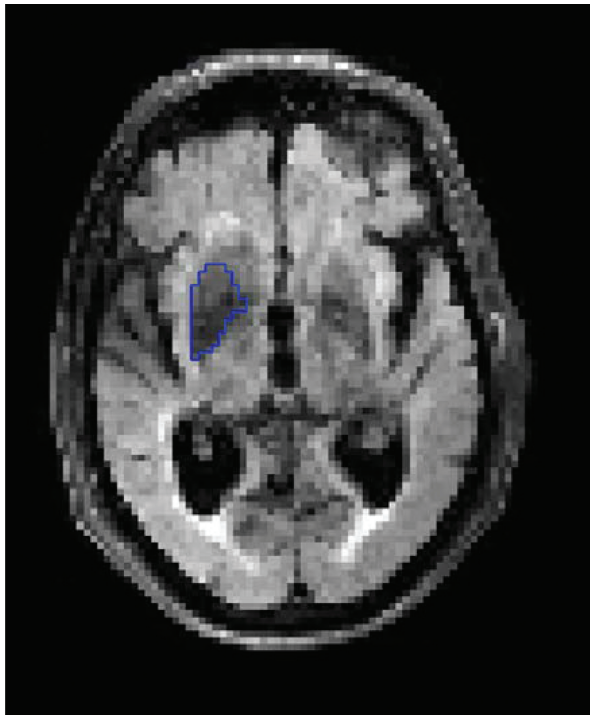

**Right lentiform nucleus** in a patient with iNPH. Measured bilaterally on one slice at the level of the foramina of Monro.

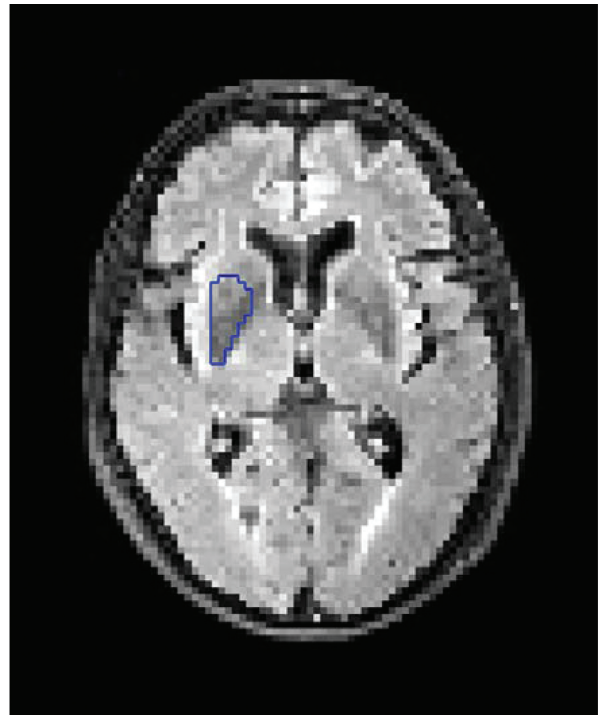

**Right lentiform nucleus** in a matched control.

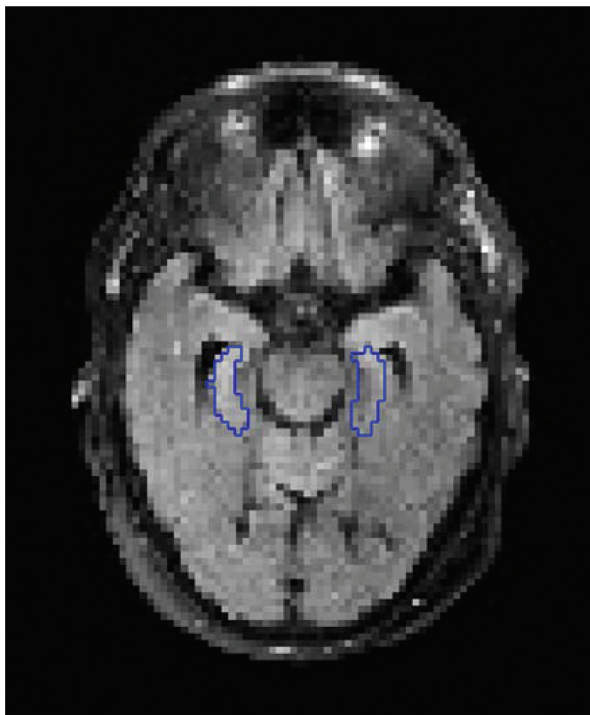

**Medial temporal lobe** in a patient with iNPH. Measured bilaterally on one slice at the level of the temporal horns.

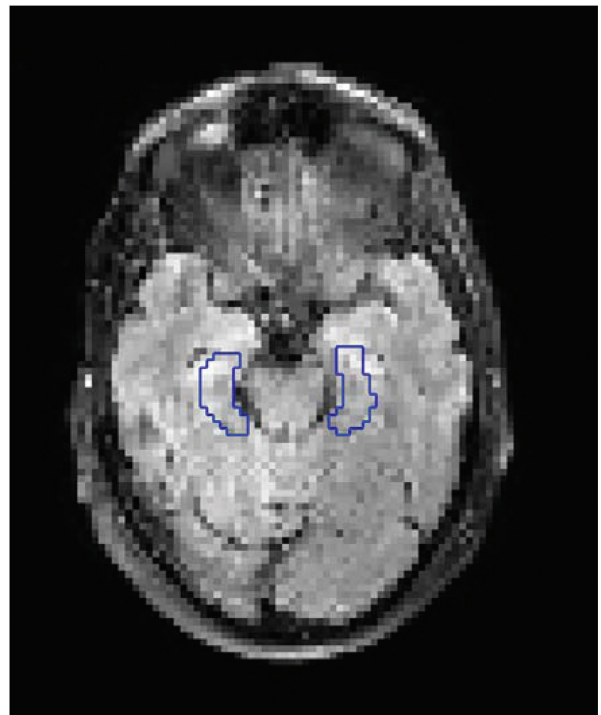

**Medial temporal lobe** in a matched control.



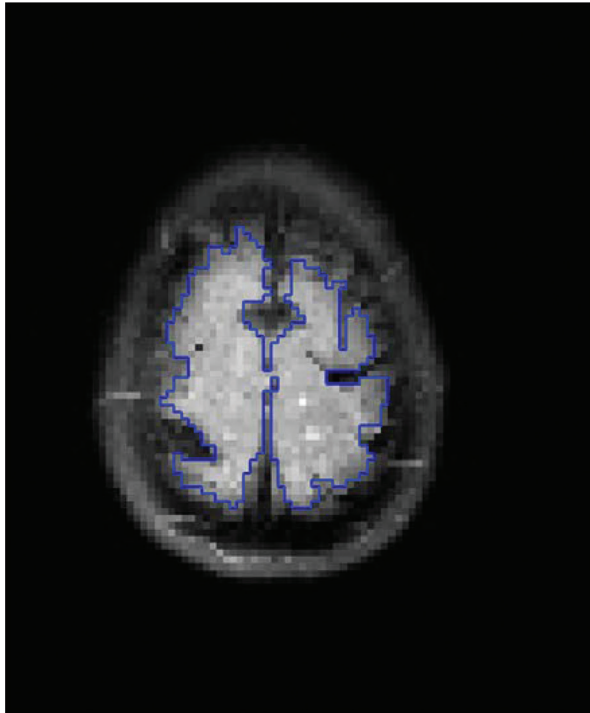

**High convexity cortex** in a patient with iNPH. Measured on the two most superior slices of the brain.

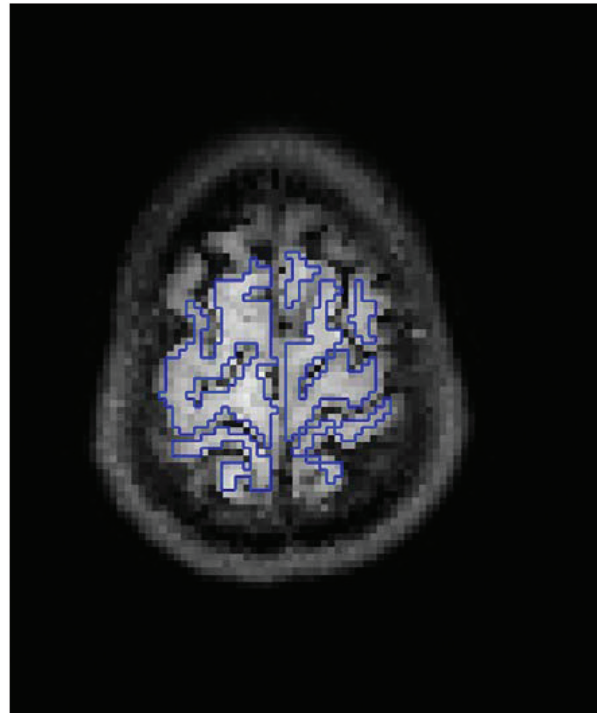

**High convexity cortex** in a matched control.

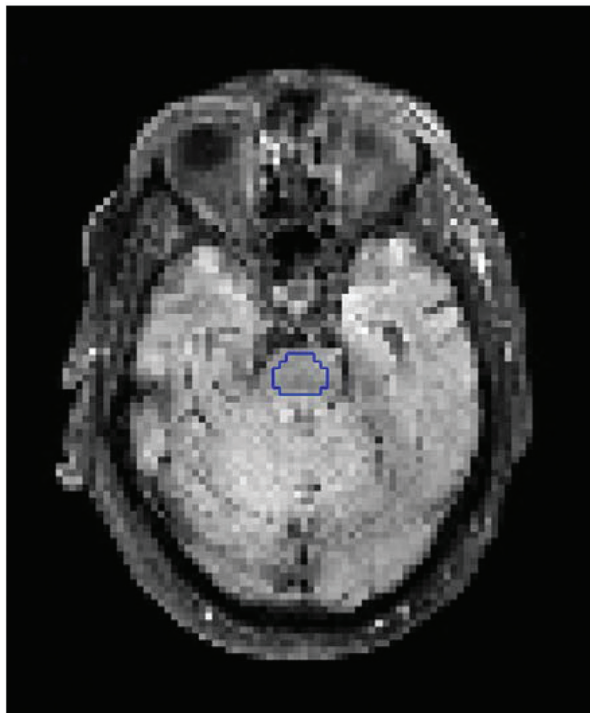

**Pons** in a patient with iNPH. Measured on three slices with the middle slice at the level of the middle cerebellar peduncles.

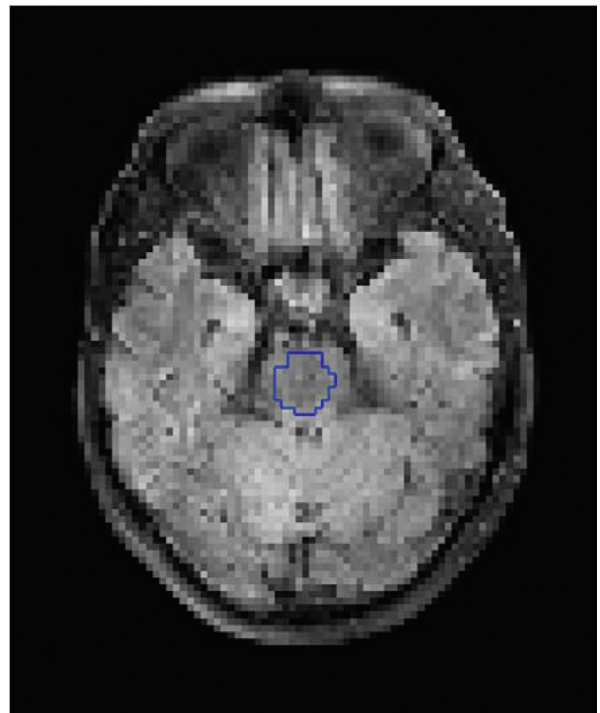

**Pons** in a matched control.



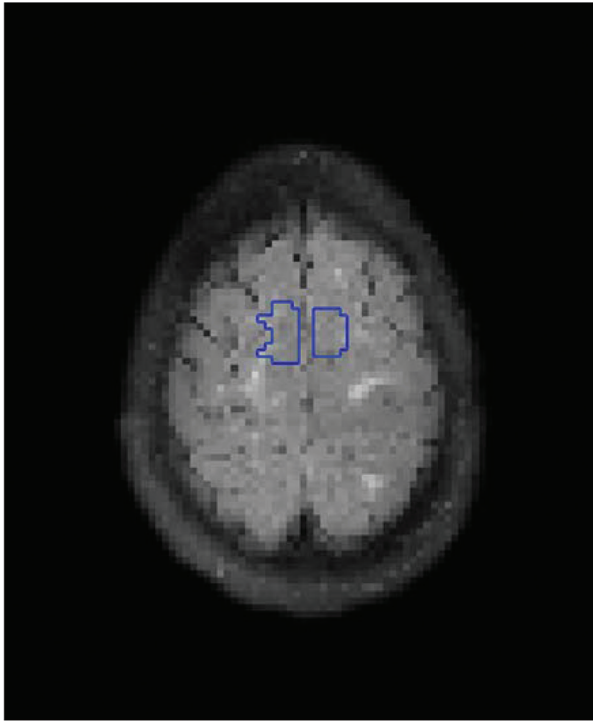

**Supplementary motor area** in a patient with iNPH. Measured on two slices.

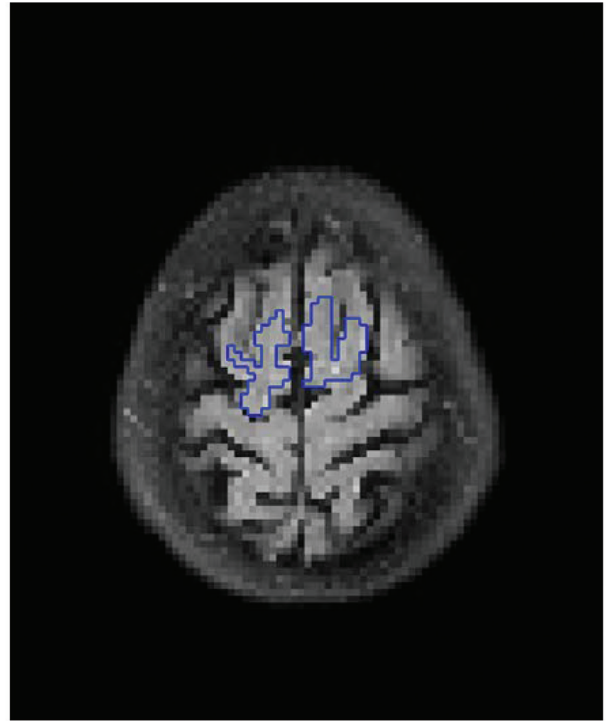

**Supplementary motor area** in a matched control.

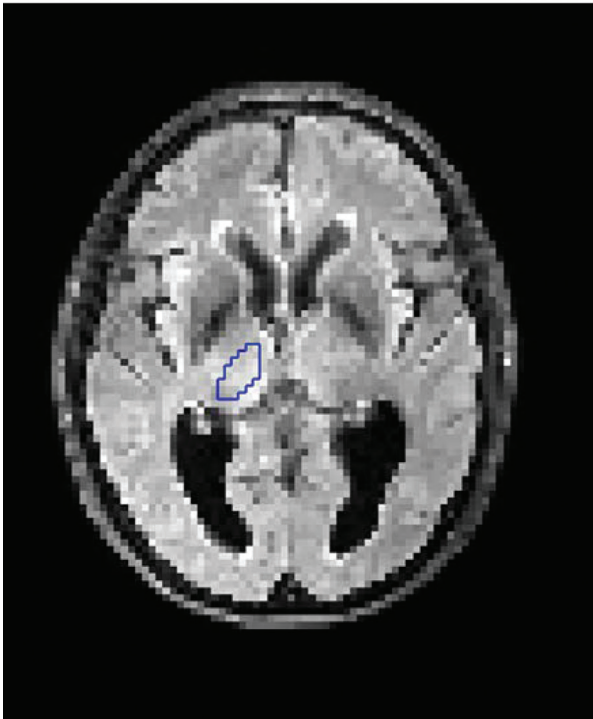

**Thalamus** in a patient with iNPH. Measured on two slices bilaterally with the superior slice at the level of the foramina of Monro.

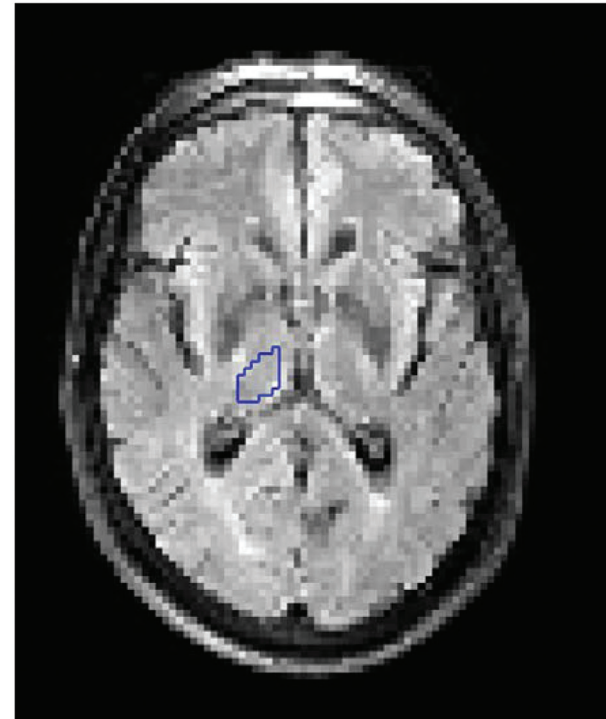

**Thalamus** in a matched control.

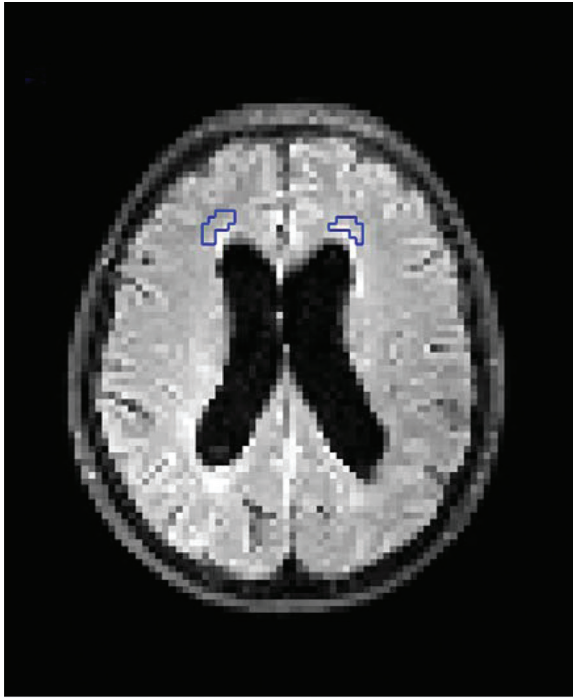

**Frontal white matter** in a patient with iNPH. Measured on two slices 5-10 mm from the ventricles at the level of the cella media.

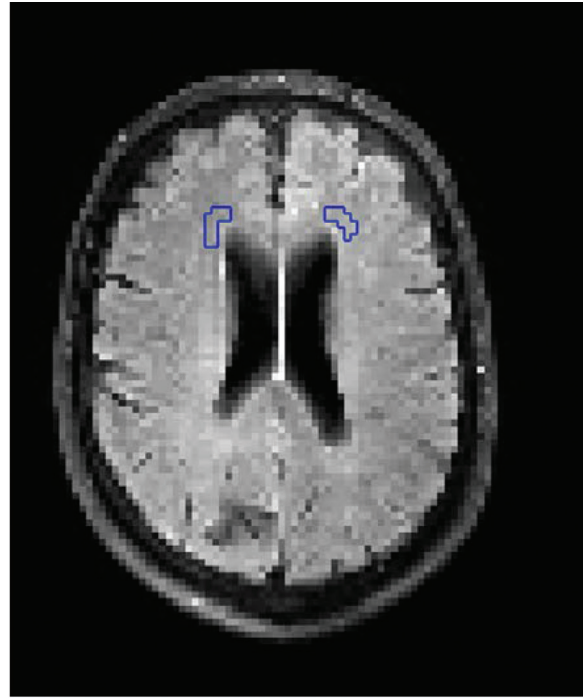

**Frontal white matter** in a matched control.

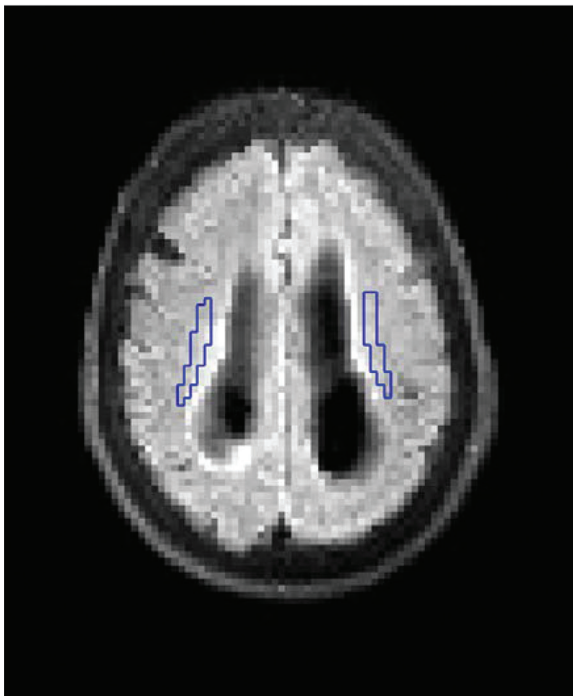

**Lateral white matter** in a patient with iNPH. Measured on two slices 5-10 mm from the ventricles at the level of the sella media.

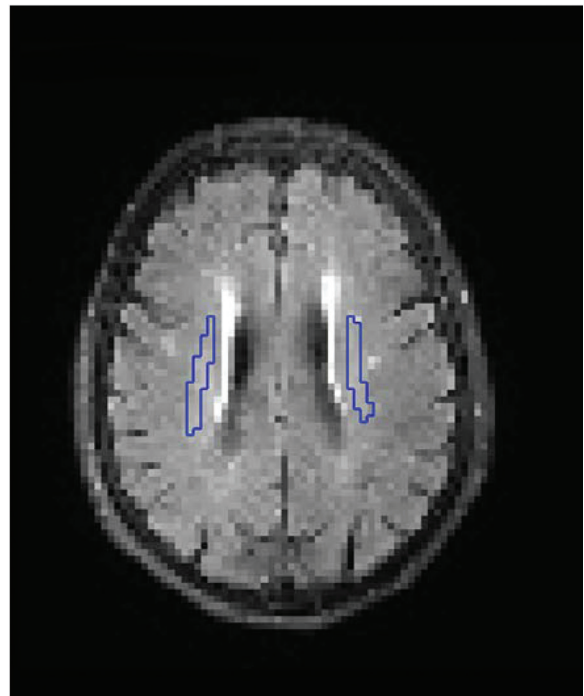

**Lateral white matter** in a matched control.

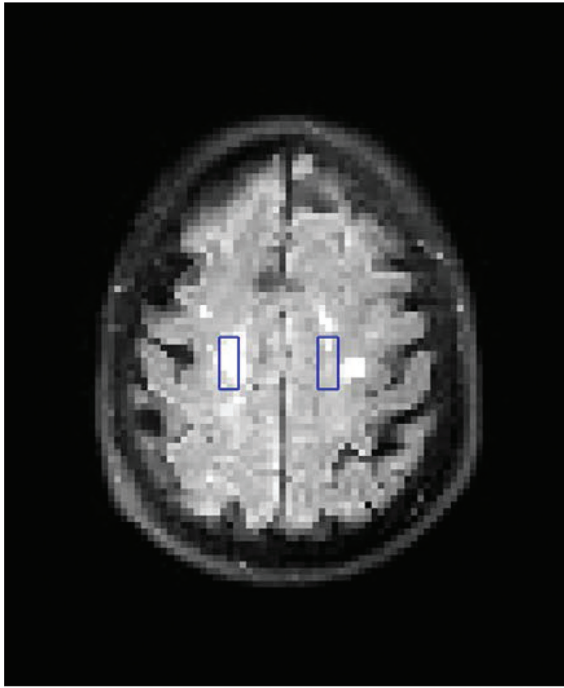

**Superior white matter** in a patient with iNPH. Measured on two slices. The inferior ROI was placed in the first slice superior of the lateral ventricles.

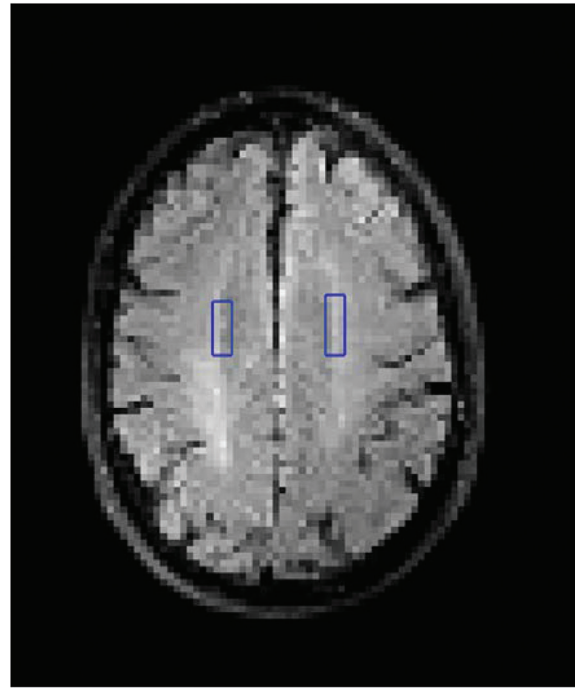

**Superior white matter** in a matched control.

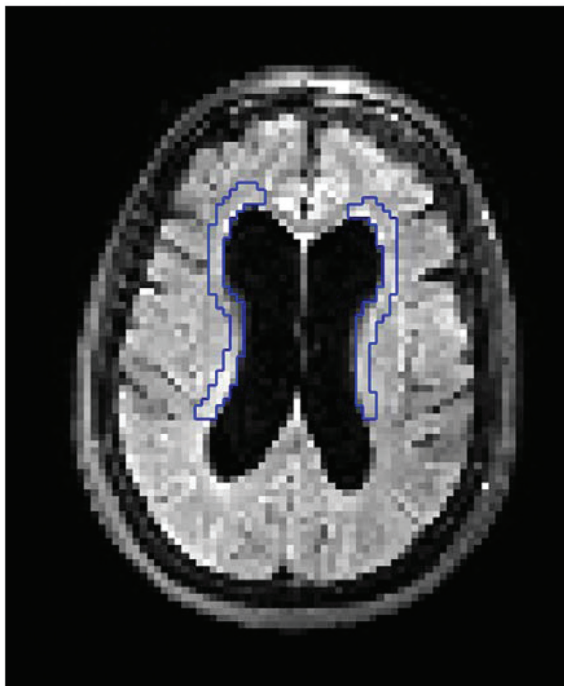

**Periventricular white matter** in a patient with iNPH. Measured on one slice at the level of the sella media.

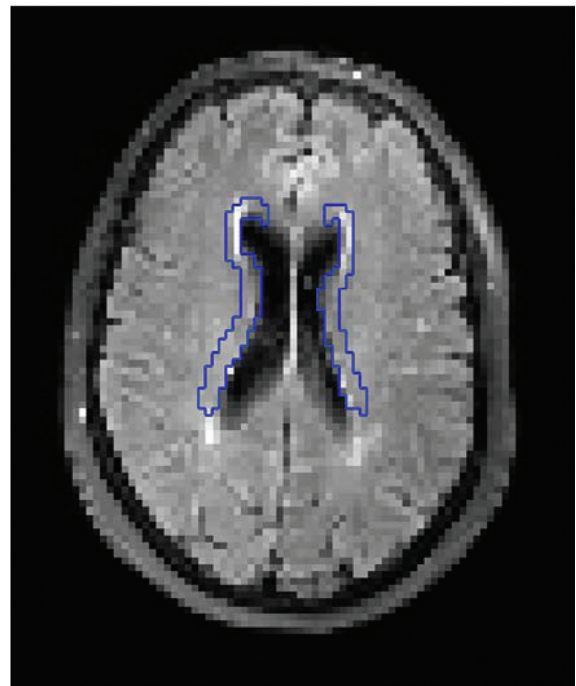

**Periventricular white matter** in a matched control.



## Explanations why nine patients were not diagnosed with probable iNPH

### *Female, 78 years of age*

Meningitis at age 16 and head trauma with fractures of the base of the skull at age 26. Symptom debut at age 76. Diagnosis possible iNPH.

### *Female, 78 years of age*

Head trauma with short observation at hospital at age 47. Symptom debut at age 76. Diagnosis possible iNPH.

### *Male, 81 years of age*

A small porencephalic cyst in connection with one of the lateral ventricles but not close to the foramina of Monro. Diagnosis possible iNPH.

### *Male, 71 years of age*

Only gait disturbance and no evident cognitive or urinary disturbance. Cervical spinal stenosis as comorbidity. Diagnosis possible iNPH.

### *Male, 68 years of age*

Severe white matter hyperintensities in the brain seen on MRI. Diagnosis possible iNPH.

### *Male, 71 years of age*

Gait disturbance affected by Parkinsonism. Diagnosis unlikely iNPH and Parkinsons disease.

### *Male, 79 years of age*

MRI shows Aqueductal stenosis. Diagnosis unlikely iNPH and non-communicating hydrocephalus.

### *Female, 66 years of age*

Symptom debut after a head truma. However, the first CT and MRI scan after the head trauma already revealed communicating hydrocephalus. Diagnosis possible iNPH.

### *Male, 71 years of age*

Parkinsonism and hyperreflexia of lower limbs. Severe white matter hyperintensities in the brain seen on MRI. Improved after administration of L-dopa. Diagnosis unlikely iNPH.
